# Supplementary material
Source: publisher figshare collection journal article supplement (https://rs.figshare.com/ndownloader/files/38311093)
Supplement: Supplementary file 1 [file 38311093]

Year	Tank	pCO2	Coral.ID	Type	Area.cm2	Growth.mg.cm2.day
2022	4	Ambient	207	Aggregate	141	0.4
2022	4	Ambient	211	Aggregate	132	0.178
2022	11	Ambient	203	Aggregate	138	0.474
2022	11	Ambient	204	Aggregate	108	0.58
2022	12	Ambient	200	Aggregate	187	0.327
2022	12	Ambient	205	Aggregate	187	0.203
2019	6	Ambient	A	Aggregate	230	0.323
2019	9	Ambient	B	Aggregate	205	0.461
2019	7	Ambient	F	Aggregate	252	0.516
2019	8	Ambient	I	Aggregate	192	0.446
2022	4	Ambient	207	Singletons	13	0.399
2022	4	Ambient	211	Singletons	12	0.434
2022	11	Ambient	203	Singletons	14	0.42
2022	11	Ambient	204	Singletons	13	0.507
2022	12	Ambient	200	Singletons	13	0.509
2022	12	Ambient	205	Singletons	19	0.088
2019	6	Ambient	A	Singletons	36	0.405
2019	7	Ambient	F	Singletons	19	0.915
2019	8	Ambient	I	Singletons	18	0.615
2022	4	Ambient	6726	Whole colony	162	0.541
2022	11	Ambient	6752	Whole colony	173	0.338
2022	12	Ambient	6738	Whole colony	370	0.237
2022	12	Ambient	6745	Whole colony	220	0.366
2022	4	Ambient	6755	Whole colony	295	0.373
2019	6	Ambient	different	Whole colony	500	0.205
2019	9	Ambient	different	Whole colony	334	0.263
2019	7	Ambient	different	Whole colony	529	0.36
2019	8	Ambient	different	Whole colony	453	0.048
2022	1	High	208	Aggregate	172	0.394
2022	1	High	210	Aggregate	134	0.707
2022	3	High	201	Aggregate	220	0.575
2022	3	High	209	Aggregate	98	0.389
2022	10	High	202	Aggregate	118	0.654
2022	10	High	206	Aggregate	135	0.599
2019	4	High	D	Aggregate	183	0.312
2019	1	High	E	Aggregate	339	0.324
2019	5	High	G	Aggregate	208	0.374
2019	11	High	J	Aggregate	257	0.142
2022	1	High	208	Singletons	20	0.325
2022	1	High	210	Singletons	12	0.555
2022	3	High	201	Singletons	21	0.55
2022	3	High	209	Singletons	21	0.393
2022	10	High	202	Singletons	8	0.573
2022	10	High	206	Singletons	14	0.439
2019	4	High	D	Singletons	18	0.696
2019	1	High	E	Singletons	27	0.462
2019	5	High	G	Singletons	17	0.92
2019	11	High	J	Singletons	15	0.64
2022	1	High	6723	Whole colony	319	0.62
2022	1	High	6769	Whole colony	363	0.545
2022	3	High	6751	Whole colony	209	0.631
2022	3	High	6764	Whole colony	288	0.279
2022	10	High	6732	Whole colony	274	0.267
2022	10	High	6737	Whole colony	200	0.476
2019	4	High	different	Whole colony	439	0.217
2019	1	High	different	Whole colony	290	0.328
2019	5	High	different	Whole colony	468	0.329
2019	11	High	different	Whole colony	710	0.165
